# Supplementary material for: Transcriptome Analysis Revealed the Embryo-Induced Gene Expression Patterns in the Endometrium from Meishan and Yorkshire Pigs
Source: MDPI journal article supplement (doi:10.3390/ijms160922692), 2015-09-18
Supplement: s1 [file s1]

# Supplementary Information

**Table S12.** Primers used for quantitative RT-PCR.

| Gene      | Primer    | Primer Sequences (5'–3') | Primer Location | Tm (°C) | Size (bp) |
|-----------|-----------|--------------------------|-----------------|---------|-----------|
| THBS1     | THBS1-F   | AGCAGCCGTTTCTATGTT       | Exon 19–20      | 60      | 220       |
|           | THBS1-R   | AATCTTTCCAGCCTATGTG      | Exon 20         |         |           |
| HMOX1     | HMOX1-F   | CGCTCCCGAATGAACACT       | Exon 3          | 60      | 137       |
|           | HMOX1-R   | TGGTCCTTAGTGTCCTGGGT     | Exon 4          |         |           |
| PRLR      | PRLR-F    | CTTGGTGGTGGCTGCGTC       | Exon 10         | 60      | 169       |
|           | PRLR-R    | GGGAGGTCCAGGGATTGT       | Exon 10         |         |           |
| HSD17B2   | HSD17B2-F | GCATAGTATTTGCTGGAGTTCT   | Exon 1          | 60      | 244       |
|           | HSD17B2-R | CATCGTTTGTATTGGGTCAT     | Exon 2          |         |           |
| STC1      | STC1-F    | TGAGGCGGAGCAGAATGA       | Exon 1          | 60      | 279       |
|           | STC1-R    | CGAATGGCGAGGAAGACC       | Exon 1          |         |           |
| ITGB3     | ITGB3-F   | CGGCAGGTGGAGGATTAC       | Exon 4          | 60      | 248       |
|           | ITGB3-R   | ATGGGCAAACAGGTGGTCT      | Exon5           |         |           |
| IGFBP3    | IGFBP3-F  | CAGAGCACGGACACCCAGAA     | Exon 2          | 60      | 225       |
|           | IGFBP3-R  | CTTATCCACGCACCAGCAGA     | Exon 4          |         |           |
| MMP7      | MMP7-F    | ACACTGTTGCTACACTTCAC     | Exon 2          | 60      | 140       |
|           | MMP7-R    | TGCCTGAGGAGAGTCAAGAT     | Exon 6          |         |           |
| S100A9    | S100A9-F  | CAAATGTCGCAGATGGAATG     | Exon 2          | 60      | 178       |
|           | S100A9-R  | GGATGTGGTTTATGGCTTTC     | Exon 3          |         |           |
| STAT1     | STAT1-F   | CTGCCAATGATGTTTCGT       | Exon 4          | 60      | 123       |
|           | STAT1-R   | TGCTTTTCCTAATGTTATGCT    | Exon 4          |         |           |
| MSX1      | MSX1-F    | TGTGGTTTCTCCTCGGTT       | 3'-UTR          | 60      | 267       |
|           | MSX1-R    | ATTTGTCTGGGCTTTTCC       | 3'-UTR          |         |           |
| BMP4      | BMP4-F    | TAGGAGCCATTCTGTAGTGC     | Exon 2          | 60      | 228       |
|           | BMP4-R    | CCCCGTCTCAGGTATCAA       | Exon 4          |         |           |
| LIF       | LIF-F     | GAGCCATTTCCCAACAAC       | Exon 2          | 60      | 120       |
|           | LIF-R     | GTAGGCGATGATGCGGTA       | Exon 3          |         |           |
| β-actin * | Actb-F    | ACGTGGACATCAGGAAGGAC     |                 | 60      | 210       |
|           | Actb-R    | ACATCTGCTGGAAGGTGGAC     |                 |         |           |

\* β-actin serves as the control gene for the endomtrium genes.
